# Supplementary material for: A broad range and piezoresistive flexible pressure sensor based on carbon nanotube network dip-coated porous elastomer sponge
Source: Royal Society of Chemistry journal article supplement (doi:10.1039/d2ra06487a), 2022-01-01
Supplement: d2ra06487a1.pdf [file d2ra06487a1.pdf]

## Supporting Information

A broad range and piezoresistive flexible pressure sensor based on carbon  
nanotube network dip-coated porous elastomer sponge

*Yuyang Cai<sup>a</sup>, Linpeng Liu<sup>a\*</sup>, Xiancun Meng<sup>b</sup>, Jingxiang Wang<sup>b</sup>, Changchao Zhang<sup>b</sup>, Jianhao  
Li<sup>b</sup>, Zhilai Lu<sup>a</sup>, Ji-an Duan<sup>a</sup>*

<sup>a</sup> The State Key Laboratory of High Performance and Complex Manufacturing, College of  
Mechanical and Electrical Engineering, Central South University, Changsha 410012, China

<sup>b</sup> Key Laboratory of Bionic Engineering, Ministry of Education, Jilin University, Changchun  
130022, China

### Corresponding Authors

\*Linpeng Liu: [linpengliu@csu.edu.cn](mailto:linpengliu@csu.edu.cn)

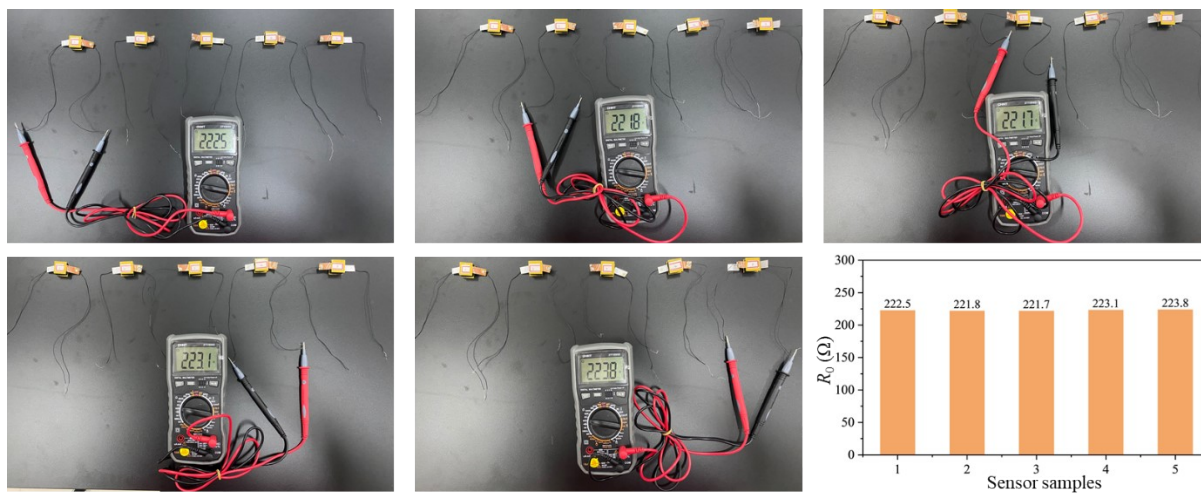

Fig. S1. The initial resistances ( $R_0$ ) of the as-prepared 5 sensor samples.

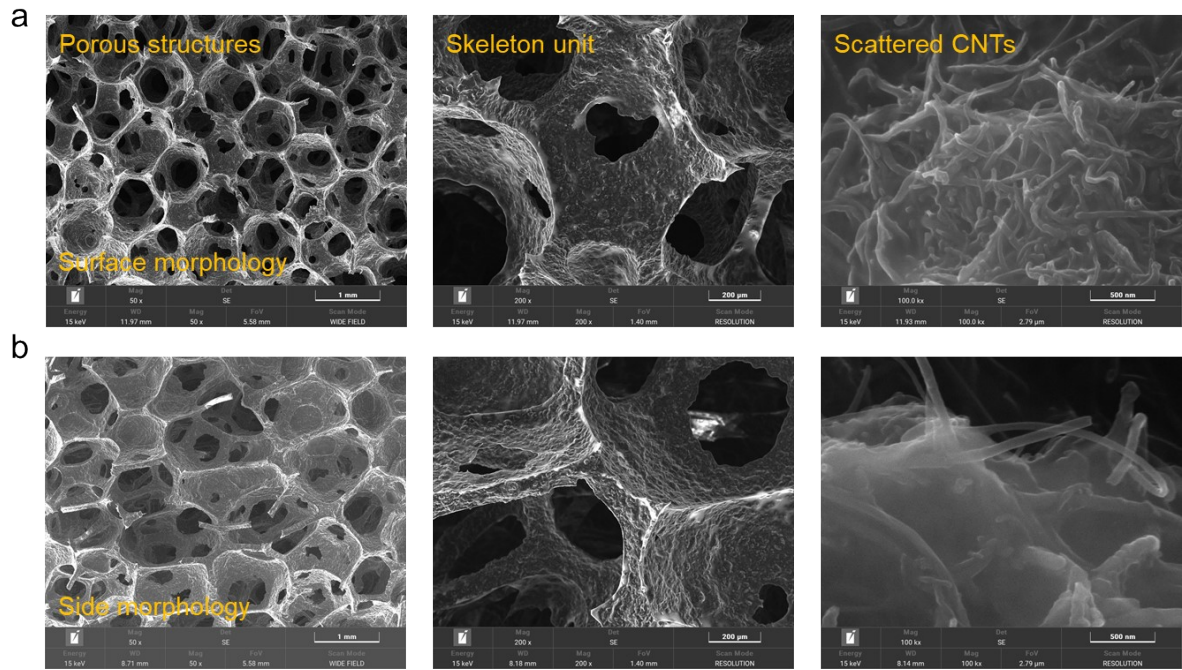

Fig. S2. a) SEM images of the surface morphology of the pressure sensor. b) SEM images of the side morphology of the pressure sensor.

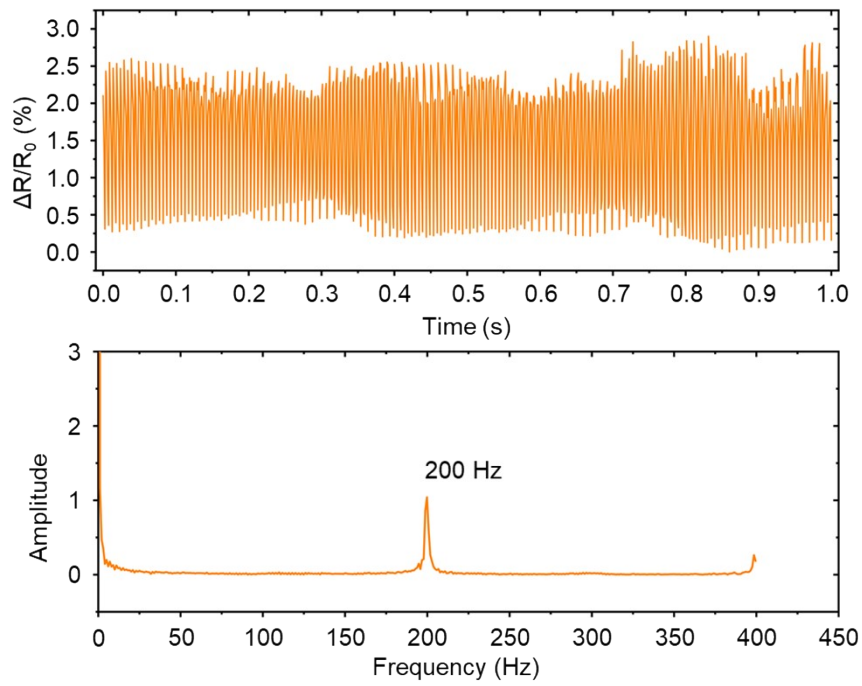

Fig. S3. The response of the sensor under an applied pressure with a frequency load of 200 Hz, and FFT result according to the response signals.

## Supplementary Tables

**Table S1** Comparison of the properties of the sponge-based pressure sensor in the references and that in our work

| Materials                         | Methods                        | Sensor types     | Sensitivity [kPa <sup>-1</sup> ] | Detection limit [Pa] | Working range [kPa] | Response and recovery time [ms] | Stability   | Ref              |
|-----------------------------------|--------------------------------|------------------|----------------------------------|----------------------|---------------------|---------------------------------|-------------|------------------|
| PET-ITO/PDMS                      | Physical foaming               | Capacitive       | 0.796                            | 4                    | 25                  | 65                              | 1000        | [1]              |
| Melamine foam/MWCNTs/MXene        | Soaking                        | Resistant        | 0.339                            | /                    | 180                 | 180/140                         | 1150        | [2]              |
| Al/PVC/PDMS                       | Gas evaporation                | Capacitive       | 0.375                            | /                    | 230                 | 190                             | 50          | [3]              |
| Graphene/PDMS                     | Sugar dissolving & Dip-coating | Capacitive       | 0.137                            | 50                   | 12                  | /                               | 100         | [4]              |
| Carbon ink/melamine               | Dip-coating                    | Resistant        | 0.056                            | 30                   | 31.36               | 100/100                         | 2000        | [5]              |
| Carbon ink/Melamine foam          | Dip-coating                    | Resistant        | 0.62                             | /                    | 150                 | 30/55                           | 2500        | [6]              |
| MWCNTs/PDMS                       | Gas evaporation                | Capacitive       | 0.19                             | /                    | 300                 | 180                             | 35          | [7]              |
| AgNW/CF/PDMS                      | Sugar dissolving               | Capacitive       | 0.161                            | /                    | 200                 | /                               | 6000        | [8]              |
| MXene/rGO/PDMS                    | Freeze-drying                  | Resistant        | 3.75                             | 1.5                  | 28                  | 20/40                           | 2000        | [9]              |
| AgNP/PDMS                         | NaCl dissolving                | Resistant        | 0.41                             | 25                   | 120                 | 30                              | 1500        | [10]             |
| Graphene/styrene-butadiene rubber | Dip-coating                    | Resistant        | 1.05                             | /                    | 150                 | /                               | 3000        | [11]             |
| MXene/PANI                        | Hydrazine-induced foaming      | Resistant        | 690.91                           | /                    | 19.12               | 106/95                          | 10000       | [12]             |
| <b>MWCNT/PU</b>                   | <b>Dip coating</b>             | <b>Resistant</b> | <b>0.00125</b>                   | <b>150</b>           | <b>350</b>          | <b>401/473</b>                  | <b>5000</b> | <b>This work</b> |

## References:

- 1 Z. Song, L. Zhao, C. Chang, Y. Zhou, W. An and S. Yu, *J. Electron. Mater.*, 2022, **51**, 7173–7181.
- 2 Y. Su, K. Ma, X. Mao, M. Liu and X. Zhang, *Nanomaterials*, 2022, **12**, 2225.
- 3 S. Dervin, E. S. Hosseini and R. Dahiya, *IEEE Sens. J.*, 2021, **22**, 9914–9921.
- 4 L. A. Kurup, C. M. Cole, J. N. Arthur and S. D. Yambem, *ACS Appl. Nano Mater.*, 2022, **5**, 2973–2983.
- 5 X. Zhang, J. Li, J. Lin, W. Li, W. Chu and X. Wang, *J. Mater. Sci. Mater. Electron.*, 2022, **33**, 13731–13742.
- 6 C. Liu, Q. Tan, L. Kong, Y. Deng, X. Ma, L. Xu, Y. Xu, W. Zhou, L. Zhong, Q. Qiang, T. Han, W. Chen and B. Liu, *Mater. Lett.*, 2023, **330**, 133331.
- 7 Z. Yun, K. Li, H. Jiang and X. Tang, *Sensors*, 2022, **22**, 2607.
- 8 S. W. Park, P. S. Das, A. Chhetry and J. Y. Park, *IEEE Sens. J.*, 2017, **17**, 6558–6564.
- 9 J. Gao, Y. Xia, J. Zhao, P. Niu, Y. Fang, J. Shen and R. Xu, *IEEE Sens. J.*, 2022, **22**, 18391–18399.
- 10 A. Paghi, M. Corsi, S. Corso, S. Mariani and G. Barillaro, *Nanoscale Horizons*, 2022, **7**, 425–436.
- 11 T. Cui, L. Yang, X. Han, J. Xu, Y. Yang and T. Ren, *Materials (Basel)*, 2021, **14**, 6475.
- 12 T. Yin, Y. Cheng, Y. Hou, L. Sun, Y. Ma, J. Su, Z. Zhang, N. Liu, L. Li and Y. Gao, *Small*, 2022, 2204806.
